# Supplementary material
Source: PubMed Central journal article supplement (PMC3866969)
Supplement: NIHMS536975-supplement-01.pdf [file NIHMS536975-supplement-01.pdf]

A

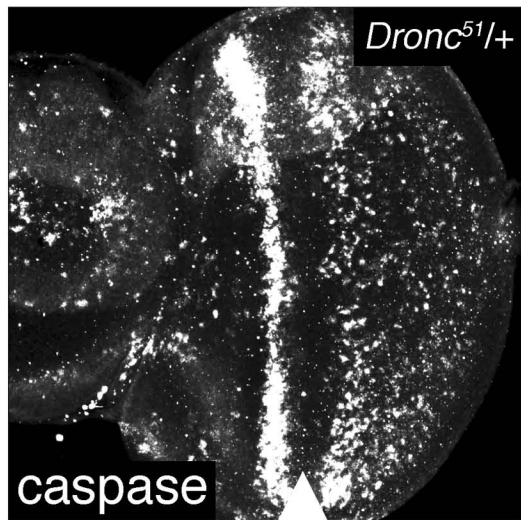

B

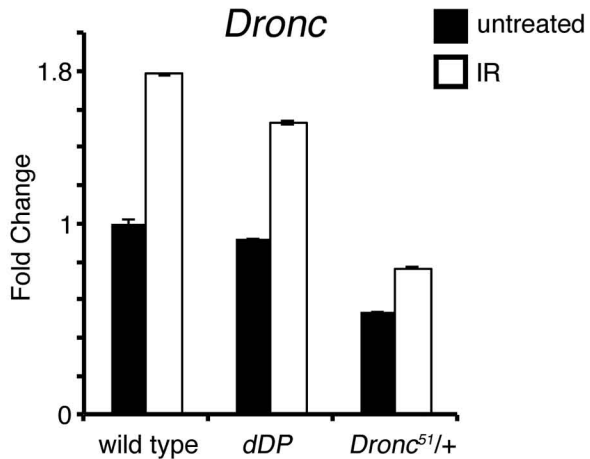

# Ambrus Supplemental Figure S2

■ tubular morphology  
□ punctate morphology

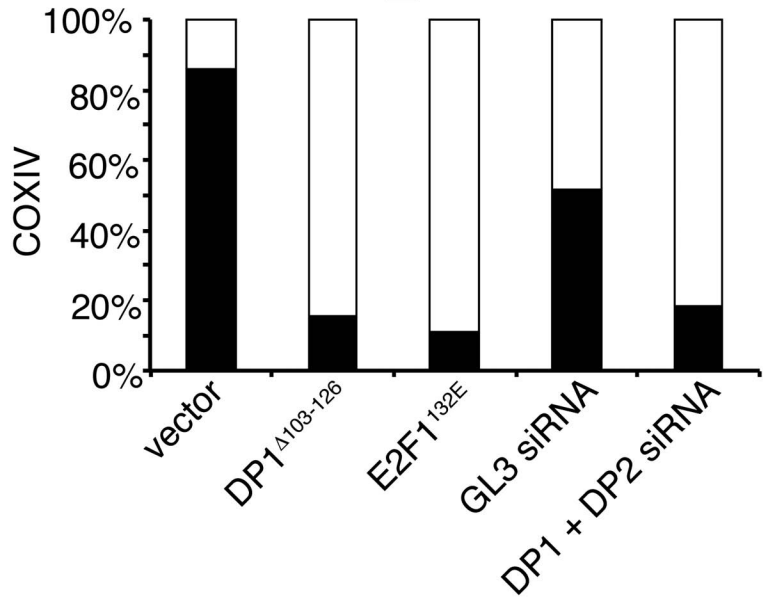

# Ambrus Supplemental Figure S3

## A

■ IR  
□ untreated

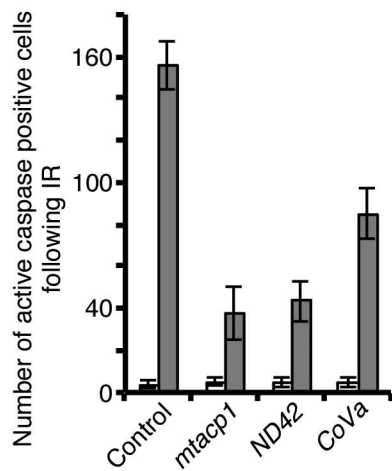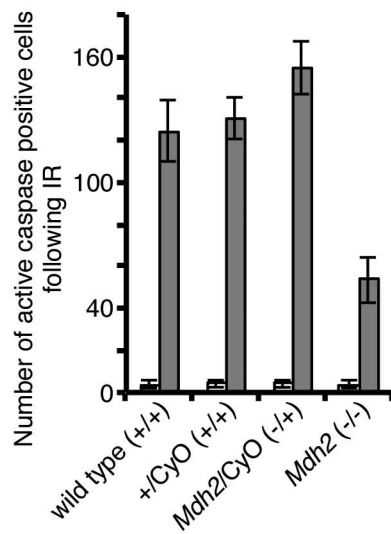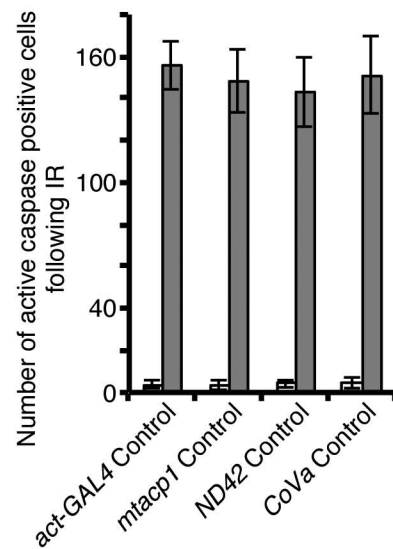

## B

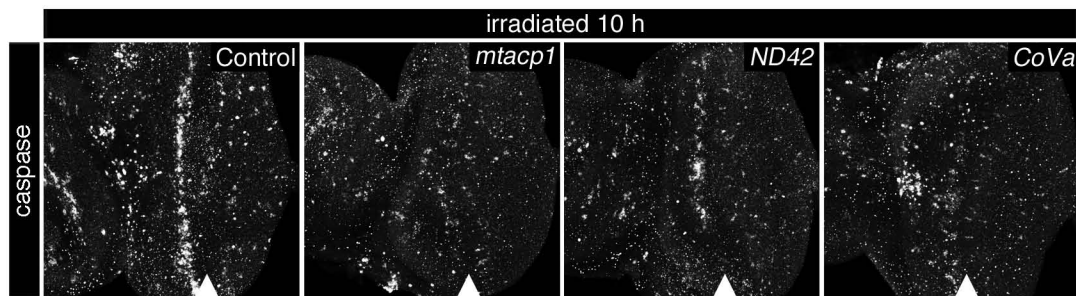

## C

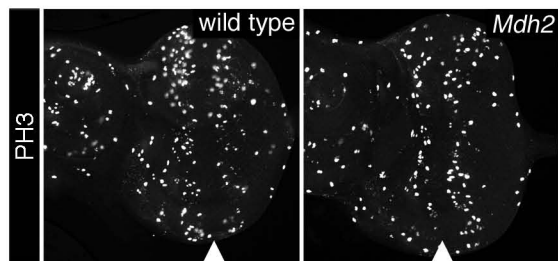

## SUPPLEMENTAL FIGURE LEGENDS

### **Supplemental Figure S1. Eye discs with reduced expression of *Dronc* efficiently undergo irradiation-induced apoptosis, related to Figure 1.**

(A) Active caspase immunostaining was used to detect apoptotic cells 4h after IR in *Dronc*<sup>51/+</sup> eye discs. The eye disc is oriented with the posterior to the right. An arrowhead indicates the morphogenetic furrow. (B) RNA was isolated from wild type, *dDP* mutant, and *Dronc*<sup>51/+</sup> larvae which were either untreated or IR. Quantitative real-time PCR was used to measure the expression of *Dronc*. Expression levels of *Dronc* for untreated (black bars) or IR (white bars), for wild type, *dDP* mutant, and *Dronc*<sup>51/+</sup> eye discs are normalized to wild type untreated ( $\pm$  SD, using 3 replicates for each genotype and treatment).

### **Supplemental Figure S2. Mitochondria display structural abnormalities in SAOS-2 cells deficient in E2F1 activity, related to Figure 5.**

SAOS-2 cells were either transfected with empty vector, dominant negative DP1 (DP1 <sup>$\Delta$ 103-126</sup>), dominant negative E2F1<sup>132E</sup>, unrelated GL3 siRNA, or DP1 and DP2 siRNA. Two days after transfection cells were immunostained for mitochondrial marker COXIV and scored for displaying a tubular or punctate mitochondria phenotype.

### **Supplemental Figure S3. Analysis of mitochondria associated dE2f1/dDP targets in irradiation-induced apoptosis, related to Figure 6.**

(A) The effect of depletion of selected mitochondria associated genes on irradiation-induced apoptosis was examined in third instar larval eye discs. For each gene indicated, the corresponding dsRNA under *Gal4-UAS* control (of the indicated lines) was expressed in the eye disc with *ey-FLP*;

*Act>>Gal4* except for the *Malate dehydrogenase 2 (Mdh2)* gene for which a mutant allele was used instead of RNAi. Active caspase immunostaining was used to detect and quantify apoptotic cells when eye discs were untreated (white bars) or 4h after irradiation (gray bars) ( $\pm$  SD, with at least 5 discs quantified for each genotype). For RNAi experiments several genetic backgrounds were used as controls: *ey-FLP; Act>>Gal4/CyO GFP* (Control or *act-GAL4* Control), *ey-FLP; +/CyO GFP*; *UAS-mtacd1<sup>RNAi</sup>* (*mtacd1* Control), *ey-FLP; +/CyO GFP; UAS-ND42<sup>RNAi</sup>* (*ND42* Control), *ey-FLP; +/CyO GFP; UAS-CoVa<sup>RNAi</sup>* (*CoVa* Control). (B) *ey-FLP; Act>>Gal4/CyO GFP* (Control) and the indicated RNAi lines of third instar larval eye discs were untreated or irradiated (IR) with 40 Gy of ionizing radiation. Active caspase immunostaining was used to detect apoptotic cells 10h after IR. All eye discs are oriented with the posterior to the right. An arrowhead indicates the morphogenetic furrow (MF).

(C) Wild type and *Mdh2<sup>2</sup>* mutant third instar larval eye discs were dissected and phosphorylated histone H3 (PH3) immunostaining was used to detect mitotic cells. All eye discs are oriented with the posterior to the right. An arrowhead indicates the morphogenetic furrow.

## **SUPPLEMENTAL TABLES**

**Supplemental Table S1. DE genes and statistics of GOBP for WT, WT IR, dDP, and dDP IR conditions. See corresponding separate Excel file.**

**Supplemental Table S2. Statistics of KEGG, GOBP, and GOCC for dDP IR vs. dDP DE genes. See corresponding separate Excel file.**

Supplemental Experimental Procedures

qPCR primers for detection of gene expression

| Gene Symbol    | Primer 1              | Primer 2             |
|----------------|-----------------------|----------------------|
| <i>Buffy</i>   | ATACTCCGGATGCTGTGAGC  | CTTGGCGTACACAATCAACG |
| <i>cyt-c-d</i> | TTCTGGTGATGCAGAGAACC  | ACTTGTATCCCGCTGCTGTG |
| <i>cyt-c-p</i> | TGCTGGTGATGTTGAGAAGG  | CGATCAGACCATGCAGATTG |
| <i>Dark</i>    | TGCGCAAGTACAATGTGAGC  | AGGCACACATCCAAGGCTAC |
| <i>Dcp-1</i>   | GACCTGCTCACCCCTGCTTAC | AGGCACGGTATTGCTTCTG  |
| <i>debel</i>   | CACAACATATCGCGACAGC   | CGAAAAAGATCCTTGGCAAC |
| <i>DIAP1</i>   | TTGTGCAAGATCTGCTACGG  | AATATACCGCATCACATCG  |
| <i>dOmi</i>    | CGGGTGTACACAGTCAATGC  | ATCGAACCAATCGTCTCCAG |
| <i>Dread</i>   | TGCACACTTGGCGCATATC   | GCGAACACTAGGAGCAAGC  |
| <i>drICE</i>   | TCAACCATGAGCACTTCGAG  | ATGTCCCTGTAGCGGCAGTC |
| <i>Dronec</i>  | ATTTGGTGAACAAGCCGAAG  | GTGTACAGCCACTTCTCCTC |
| <i>Drp1</i>    | GTCTCCGACAAGAGCCAGAC  | TTCCGTGGTCTCGATATTCC |
| <i>grim</i>    | ACATCATCATCAGCAACAG   | CAGAGCGTAGCAAGAT     |
| <i>hid</i>     | AGAGCTCCAATAGCCACTCG  | CTTCGCCCTTTGTGCTTCTC |
| <i>rpr</i>     | CCAGTTGTGTAATCCGAACGA | GGATCTGCTGCTCTTCTGC  |
| <i>skl</i>     | GCACCAACTAAGGCTCCTA   | TGCTACTGTCTCGCTCATT  |

qPCR primers for ChIP validations

| Gene Symbol   | Primer 1                    | Primer 2                  | Amplified genomic region relative to translation start site |
|---------------|-----------------------------|---------------------------|-------------------------------------------------------------|
| <i>Acon</i>   | GATTTAAGTTTAAACGCCATAGAGTCC | GTTTCCCGCCAAAATGGGTCG     | -313 to -187                                                |
| <i>CG5599</i> | AGACCGCCAGTCCGGAATTC        | CTATTTTACGGGATCGACGAGG    | -877 to -729                                                |
| <i>CoVa</i>   | CGAGCCATTAGTCACTTACAGC      | GATGACCCAGTACAACGAAGATGG  | -1004 to -857                                               |
| <i>Mdh2</i>   | CATAAAATGTTCCCCCAAATCAAAA   | TCCCACGGGCCAATGAAACAG     | -219 to -71                                                 |
| <i>mtacp1</i> | GCTATTGTCCGCGAAAGTTGGC      | GTTGCAATAAACTCTTCAATGAAGC | -1763 to -1627                                              |
| <i>ND23</i>   | GACGATGAGGGGGAAGAGAC        | AATAATGACTACCGGATGAGCAATG | -767 to -918                                                |
| <i>ND42</i>   | CATCTAGTCGTACCAGCGG         | CTTTGCCCTGCTGGATGTGC      | -1889 to -1739                                              |

qPCR primers for measuring mitochondrial DNA content

| Gene Symbol      | Primer 1                  | Primer 2              |
|------------------|---------------------------|-----------------------|
| <i>mt:Col</i>    | GCAGGTTTATTCACTGATACCC    | TGAGGTTATCCAGCCAATC   |
| <i>mt:Coll</i>   | GCTGCTGATGTATTCATCTTGG    | AGCCCCACAGATTTCTGAAC  |
| <i>mt:CollII</i> | CCACGGAAATTCATGATTAATCG   | TCAATGACAGTCTTCAAAC   |
| <i>mt:Cyt-b</i>  | GAATTCCTCCGAGGATTCAA      | AACTGTGAGCTCCAATTC    |
| <i>mt:ND4</i>    | CCCAGAAAGACATAAACCATGA    | TTGCTTATCATCTGTTGCTCA |
| <i>mt:ND5</i>    | CCTTAAACAACAGCTGAAGTTAAGG | TGCTGGGCTATTATTCACA   |
| <i>mt:rrRNA</i>  | AACGACGGTATATAAACTGATTACA | AAAAATTTGGCGGTTTATGCT |

qPCR control primers

| Gene Symbol      | Primer 1              | Primer 2                |
|------------------|-----------------------|-------------------------|
| <i>β-Tubulin</i> | ACATCCCAGCCCGTGGTC    | AGAAAGCCTTGGCCTGAACATAG |
| <i>RpP0</i>      | GTCAACCAAGGCTACGACTCC | GCCCACGGACAACAACAGC     |

qPCR primers for detection of gene expression in SAOS-2 cells

| Gene Symbol       | Primer 1                | Primer 2                 | Ensembl Gene ID |
|-------------------|-------------------------|--------------------------|-----------------|
| <i>ACO2</i>       | AGCCAGGAAATGAGCGAGG     | ATGGTCAAGTGGATGGTGG      | ENSG00000100412 |
| <i>APOO2884.2</i> | TTGGAAAGTGTAGGCGCTGG    | TTCTGGTGTATGCTTGGCC      | ENSG00000255292 |
| <i>COX5A</i>      | TTCCGTGCTATCCCATGGG     | ACGCAATCCCAGGCATCTA      | ENSG00000178741 |
| <i>DBT</i>        | TGGCTCAGGAAAGATGGCA     | TGGGTTCTGTTTTGTCTTTGCC   | ENSG00000137992 |
| <i>MDH2</i>       | ACGGTGACATTTCTCTTGTGGG  | GAGGTACCAGACAAGGCTTCA    | ENSG00000146701 |
| <i>NDUFA7</i>     | CTGTGGGCTCAGCCACAAG     | GCCTTCTGCCAGCAGATGAT     | ENSG00000167774 |
| <i>NDUFA10</i>    | CAAGGTGTTGTGTGGAGCG     | ACAGTAAGTGAAGGTGAGTCT    | ENSG00000130414 |
| <i>NDUFAB1</i>    | GCTCCTTCTTCCAGCTTTCA    | AGACGCCCACTCTTCTTC       | ENSG00000004779 |
| <i>NDUFS8</i>     | TGAGGAGCTGCTGATACACAA   | TGGGTCGGAGTGGTTTTATT     | ENSG00000110717 |
| <i>POLR2A</i>     | ATCTCCAGGTCATTTGCTGCTGT | GCTTGAAGCCAAATGGAATCCGCT | ENSG00000181222 |
| <i>SDHD</i>       | GCTTCCGAATCCAGTGGTCA    | TGGCTCGGTGACAAGTGTAT     | ENSG00000204370 |
| <i>TFDP1</i>      | ATGGCCATGAACATCATCTC    | CCTCTGCTTCCACCTCTA       | ENSG00000198176 |
| <i>TFDP2</i>      | GGCGGATAGAAGCGATAAAG    | CGATTTCTCTGTACCAGGTTT    | ENSG00000114126 |

qPCR primers for ChIP in SAOS-2 cells

| Gene Symbol           | Primer 1             | Primer 2             | Ensembl Gene ID                     |
|-----------------------|----------------------|----------------------|-------------------------------------|
| <i>ACO2</i>           | TCTTCTCATCAGAGGCCACA | GGGTTCCCGTCTCTTCTTCA | ENSG00000100412                     |
| <i>APOO2884.2</i>     | GACCACCAAGGAAGGTGAAA | CAGCAGAAGCGCAGTTTAA  | ENSG00000255292                     |
| <i>COX5A</i>          | CCTCGCTCATCTCTACTT   | GCGCTGAGGACAACATGTTA | ENSG00000178741                     |
| <i>DBT</i>            | GCTCGTTTTCTCCCTCCCTA | GCCGAAACTGGAGAGACT   | ENSG00000137992                     |
| <i>FH</i>             | TGAATCCGAAGGCTTACAC  | TCCAATCAACAGCCTCACAC | ENSG00000091483                     |
| <i>Int20D, Int26E</i> |                      |                      | as described in Beshiri et al. 2012 |
| <i>MDH2</i>           | GGTCTCTGCAACTTGGGAAA | TCTGAGCTCCGGAAAGGTAG | ENSG00000146701                     |
| <i>NDUFA7</i>         | ACCGGAGTGGAGGAAGAGT  | TCTGATGTTCCCTTTAACGA | ENSG00000167774                     |
| <i>NDUFA10</i>        | TGGTGAACCCCGCTCTCTAC | CCCAGTAGCTGGGACTACA  | ENSG00000130414                     |
| <i>NDUFAB1</i>        | GTGTAGGATTAAGGCGTCA  | ACACGGCAGCAGAAACCTAC | ENSG00000004779                     |
| <i>NDUFA7</i>         | ACCGGAGTGGAGGAAGAGT  | TCTGATGTTCCCTTTAACGA | ENSG00000167774                     |
| <i>NDUFS8</i>         | GGCTACCATCGGTGTCTCTC | TCTGCGTGGAGGTAGTAG   | ENSG00000110717                     |
| <i>SDHD</i>           | GACCACCAAGGAAGGTGAAA | CAGCAGAAGGCGCAGTTA   | ENSG00000204370                     |

siRNA primers

| Gene Symbol | Primer                   |
|-------------|--------------------------|
| <i>DP1</i>  | GCCAAACGGAGAACUCAAGGdTdT |
| <i>DP2</i>  | GCUACUGGCUUGGUCUUGdTdT   |
